# Supplementary material for: Molecular basis for RASSF10/NPM/RNF2 feedback cascade–mediated regulation of gastric cancer cell proliferation
Source: PubMed Central journal article supplement (PMC8339327; doi:10.1016/j.jbc.2021.100935), 2021-07-03
Supplement: mmc3.pdf [file mmc3.pdf]

Molecular basis for RASSF10/NPM/RNF2 feedback cascade-mediated regulation of gastric cancer cell proliferation

Naga Padma Lakshmi Ch, Ananthi Sivagnanam, Sebastian Raja,  
Sundarasamy Mahalingam\*

Sundarasamy Mahalingam,  
E-mail: [mahalingam@iitm.ac.in](mailto:mahalingam@iitm.ac.in)

**This PDF file includes:**

**Figures S1 to S11**

**Tables S1 to S5**

**Legends for Movies S1 and S2**

Supplementary Figure 1

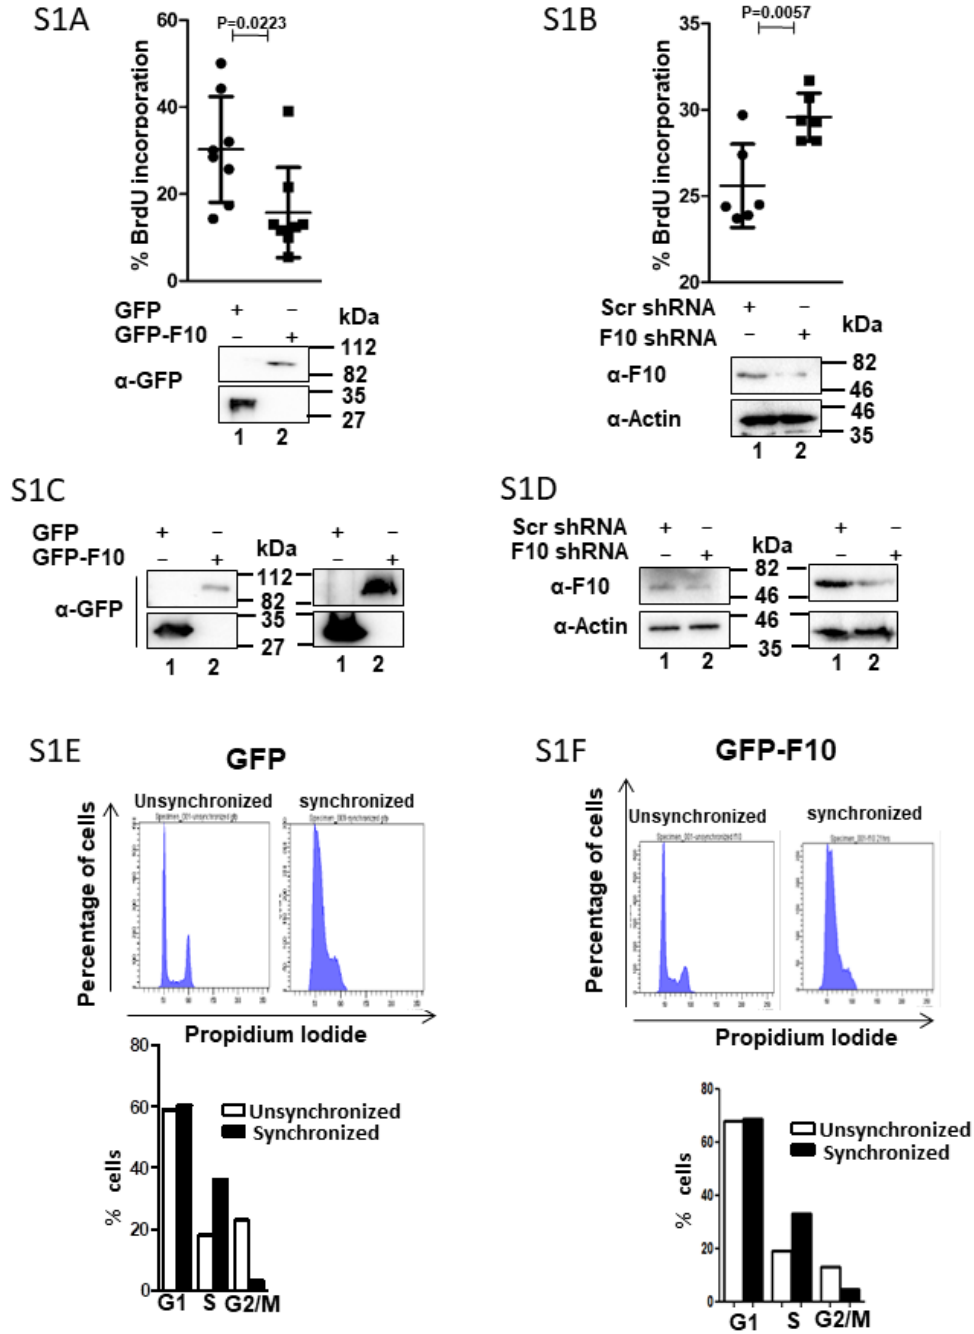

**Figure S1:** BrdU incorporation in AGS cells with (A) ectopic expression and (B) knockdown of RASSF10. The status of RASSF10 expression (C) and knockdown (D) for MTT and Cell counting experiments were analysed by western blot analysis using indicated antibodies. AGS cells were transiently transfected with GFP (E) and RASSF10 (F) and synchronized at G1 phase by double thymidine block before being used for cell cycle analysis. RASSF10 referred as F10.

Supplementary Figure 2

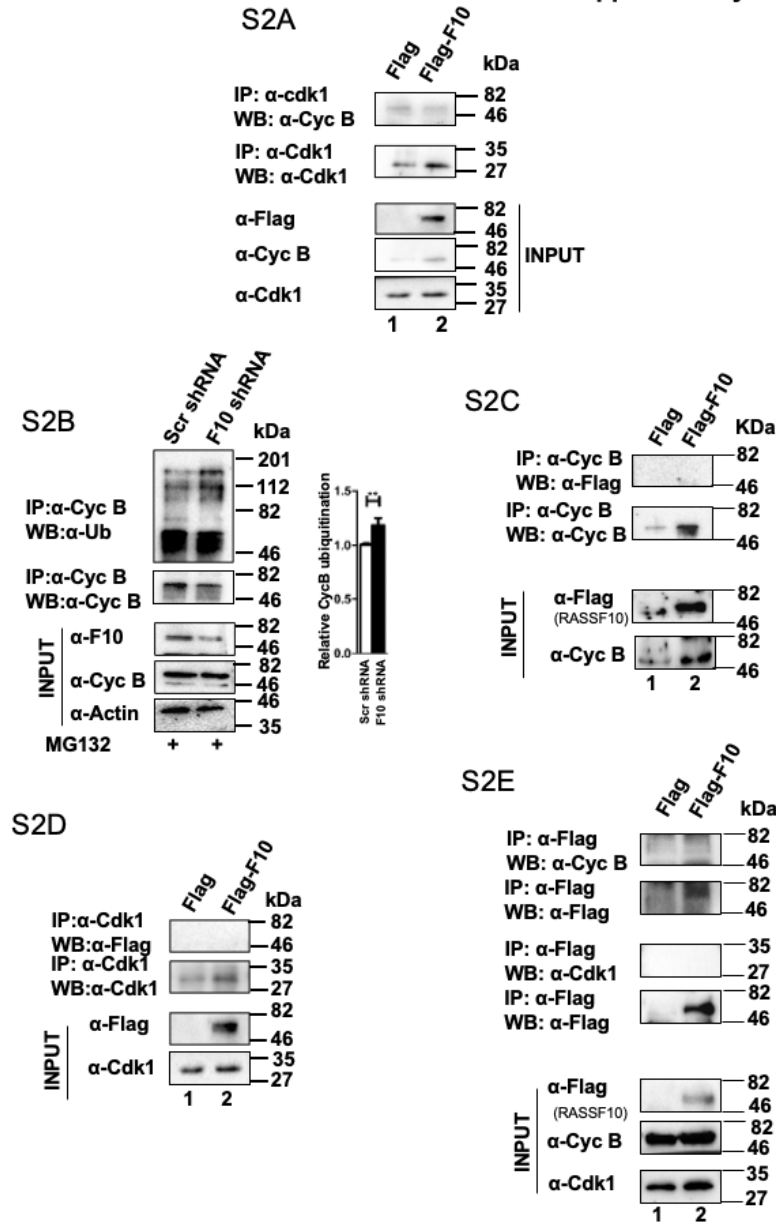

**Figure S2:** (A) RASSF10 expression alters the interaction between cyclin-B and Cdk1 in AGS cells. (B) Knockdown of RASSF10 promotes cyclin-B polyubiquitination. Results from the coimmunoprecipitation experiments suggest that neither cyclin-B (C) nor Cdk1 (D) interacts with RASSF10. (E) Reverse coimmunoprecipitation assay confirms that RASSF10 interacts with neither cyclin-B nor Cdk1. The densitometry analysis of western blots was carried out by normalizing the ubiquitination level of endogenous proteins to the amount of protein in pull-down as loading control (n=3 and data is expressed as mean ± SD). RASSF10 referred as F10; Cyclin-B referred as Cyc B. (\*p<0.05; \*\*p<0.01).

Supplementary Figure 3

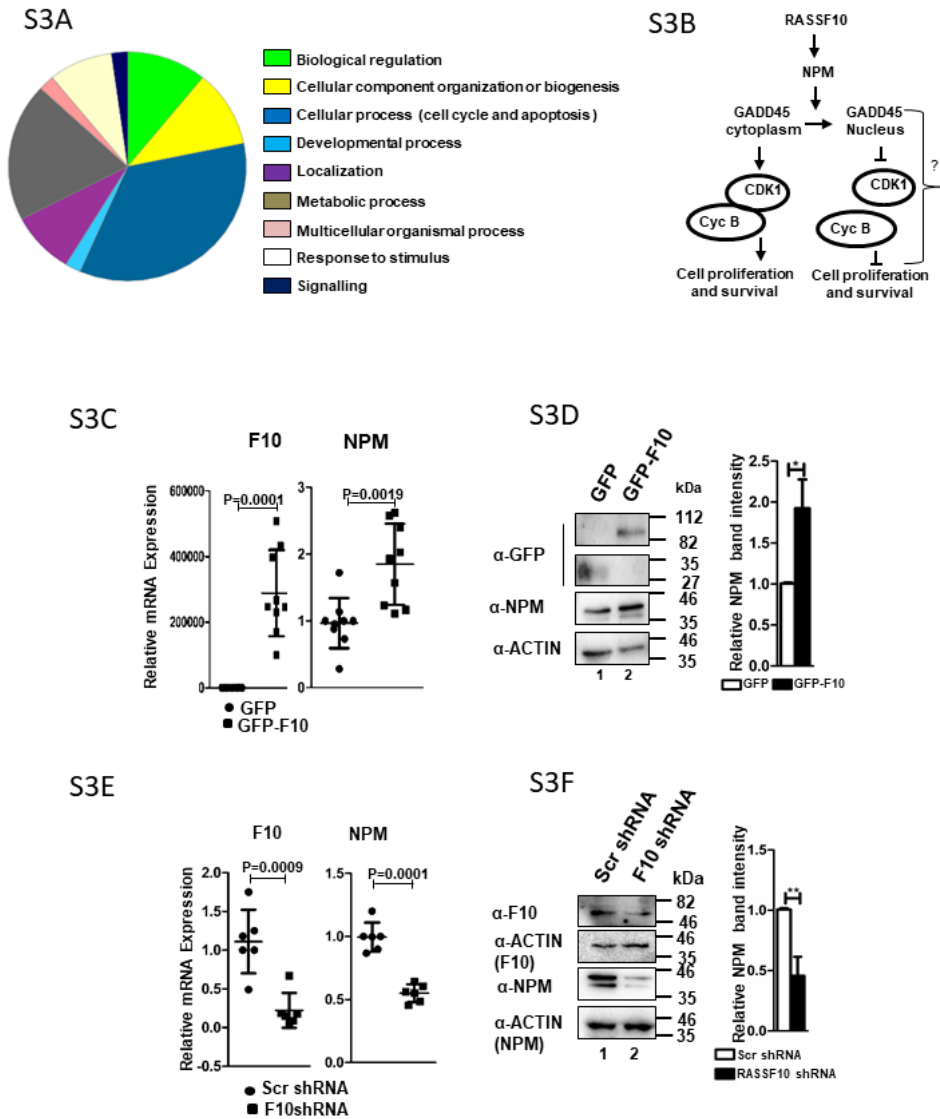

**Figure S3:** (A) Pathway analysis for RASSF10 deregulated proteins identified by proteomics. (B) Schematic working model on RASSF10 mediated mitotic arrest during cell cycle. RASSF10 modulates NPM levels and facilitates the nuclear translocation of GADD45a to alter the cyclin-B/Cdk1 kinase complex formation to control cell proliferation. RASSF10 upregulates the levels of NPM transcript (C) and protein (D) in AGS cells. RASSF10 knockdown resulted in reduction of NPM transcript (E) and (F) protein levels. The densitometry analysis for western blots was carried out by normalizing the expression level of endogenous proteins to  $\beta$ -actin, as loading control (n=3 and data is expressed as mean  $\pm$  SD). RASSF10 referred as F10. (\*p<0.05; \*\*p<0.01).

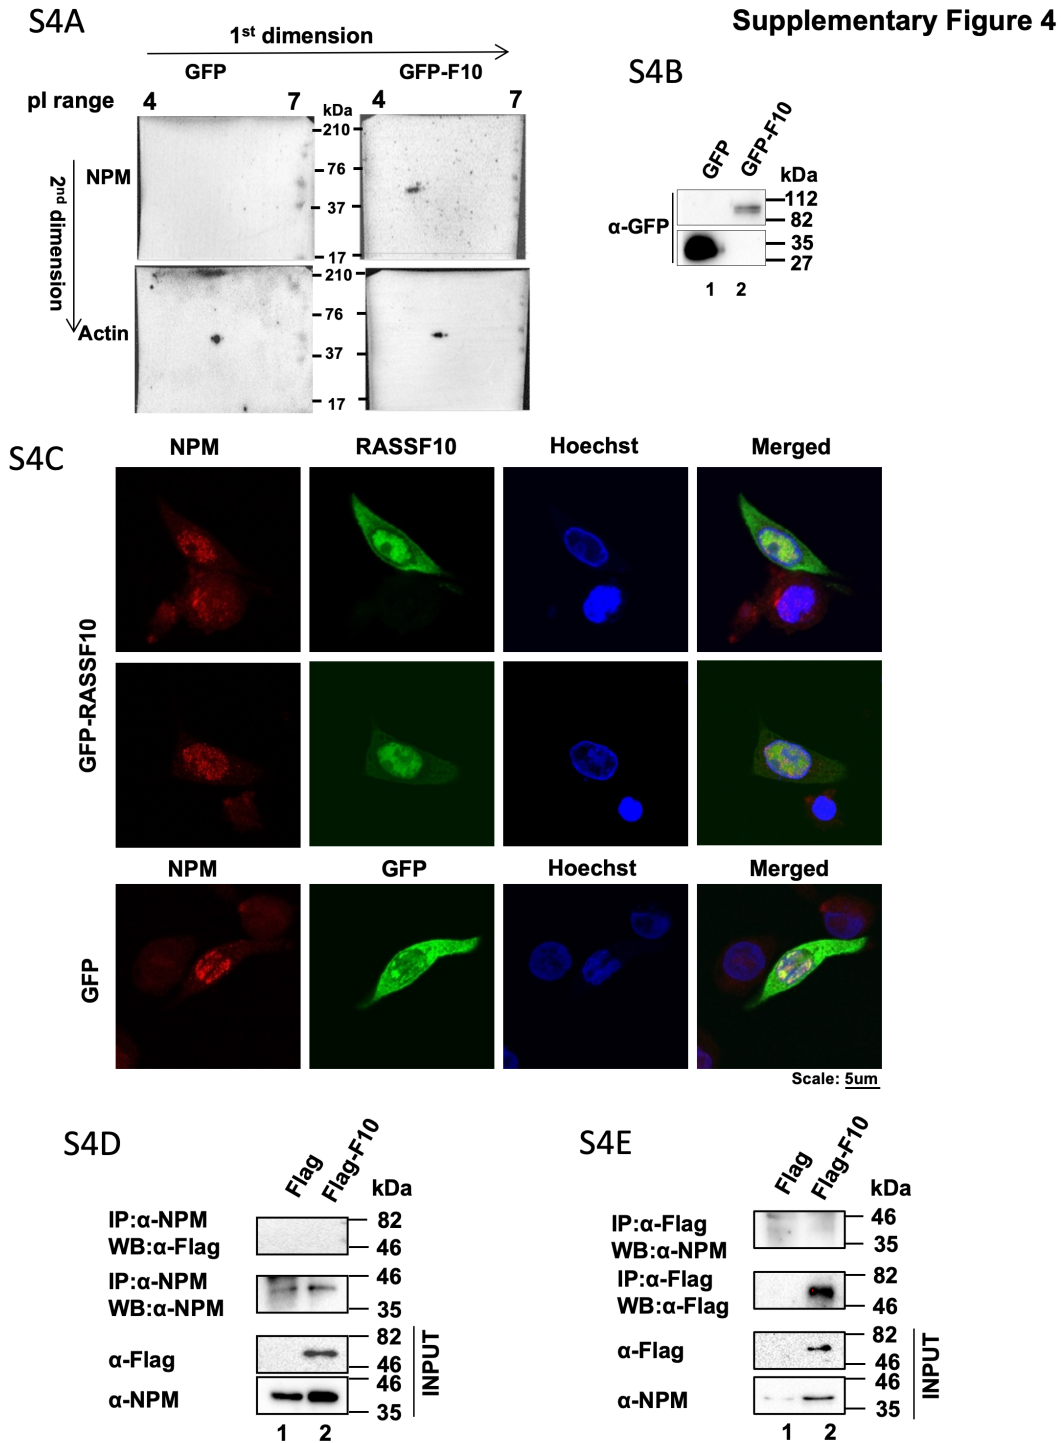

**Figure S4:** (A) Two-dimensional electrophoresis (2DE) followed by western analysis indicates that RASSF10 upregulates NPM protein levels in AGS cells. (B) Expression levels of RASSF10 in AGS cell lysates used for 2DE analysis. (C) RASSF10 and NPM are localized to the nucleus in contrast to the cytoplasmic localization of GFP. Results from the co-immunoprecipitation experiments with anti-NPM antibody (D) and anti-Flag antibody (E) suggest that there is no interaction between RASSF10 and NPM.

Supplementary Figure 5

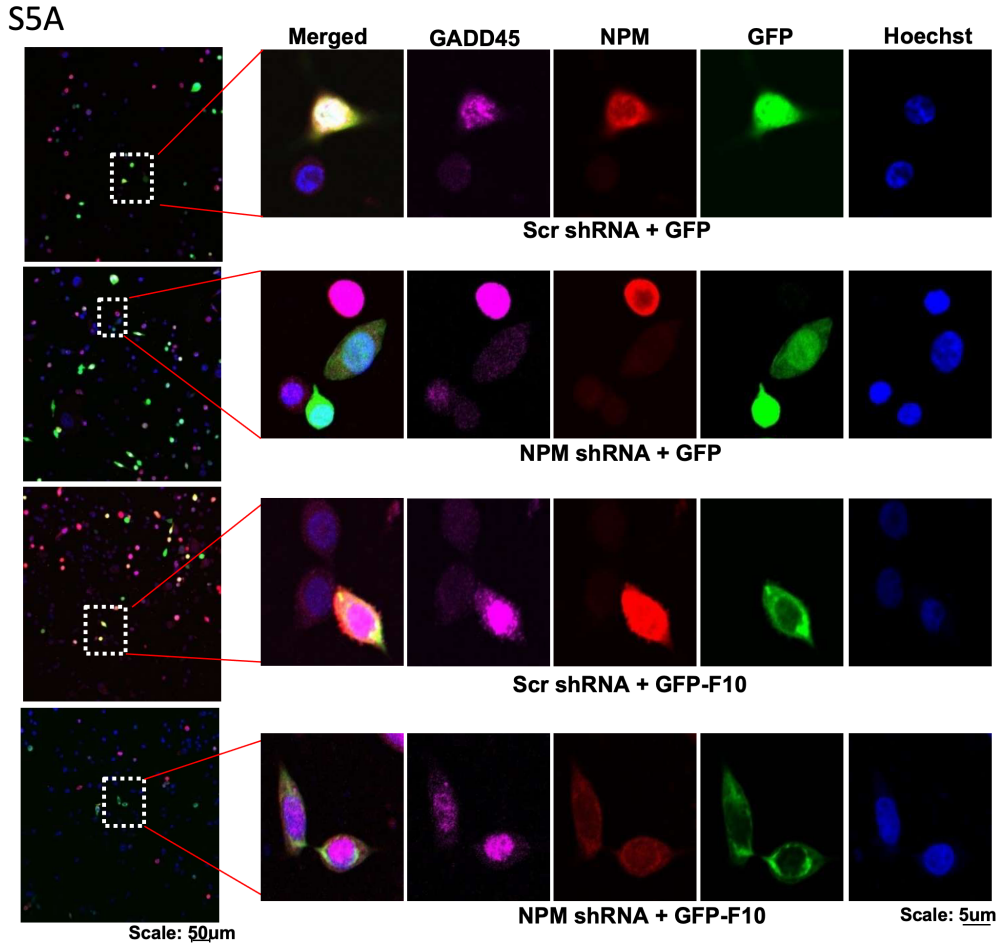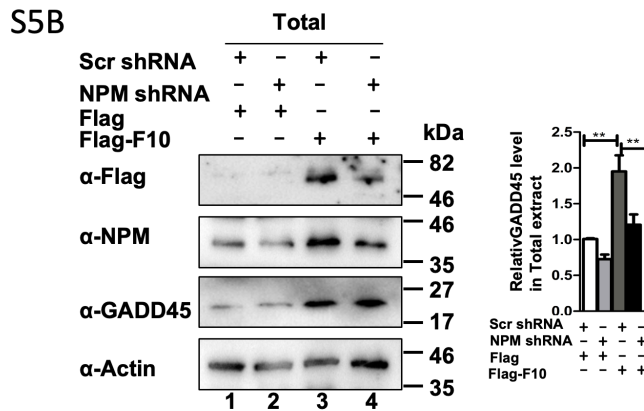

**Figure S5:** (A) RASSF10 facilitates the translocation of GADD45a to the nuclear compartment in NPM dependent manner in AGS cells. (B) The expression levels of RASSF10, GADD45a and the efficiency of NPM knockdown were analysed by western blot using indicated antibodies. The densitometry analysis for western blots was carried out by normalizing the expression level of endogenous proteins to  $\beta$ -actin, as loading control (n=3 and data is expressed as mean  $\pm$  SD). RASSF10 referred as F10. (\*p<0.05; \*\*p<0.01).

Supplementary Figure 6

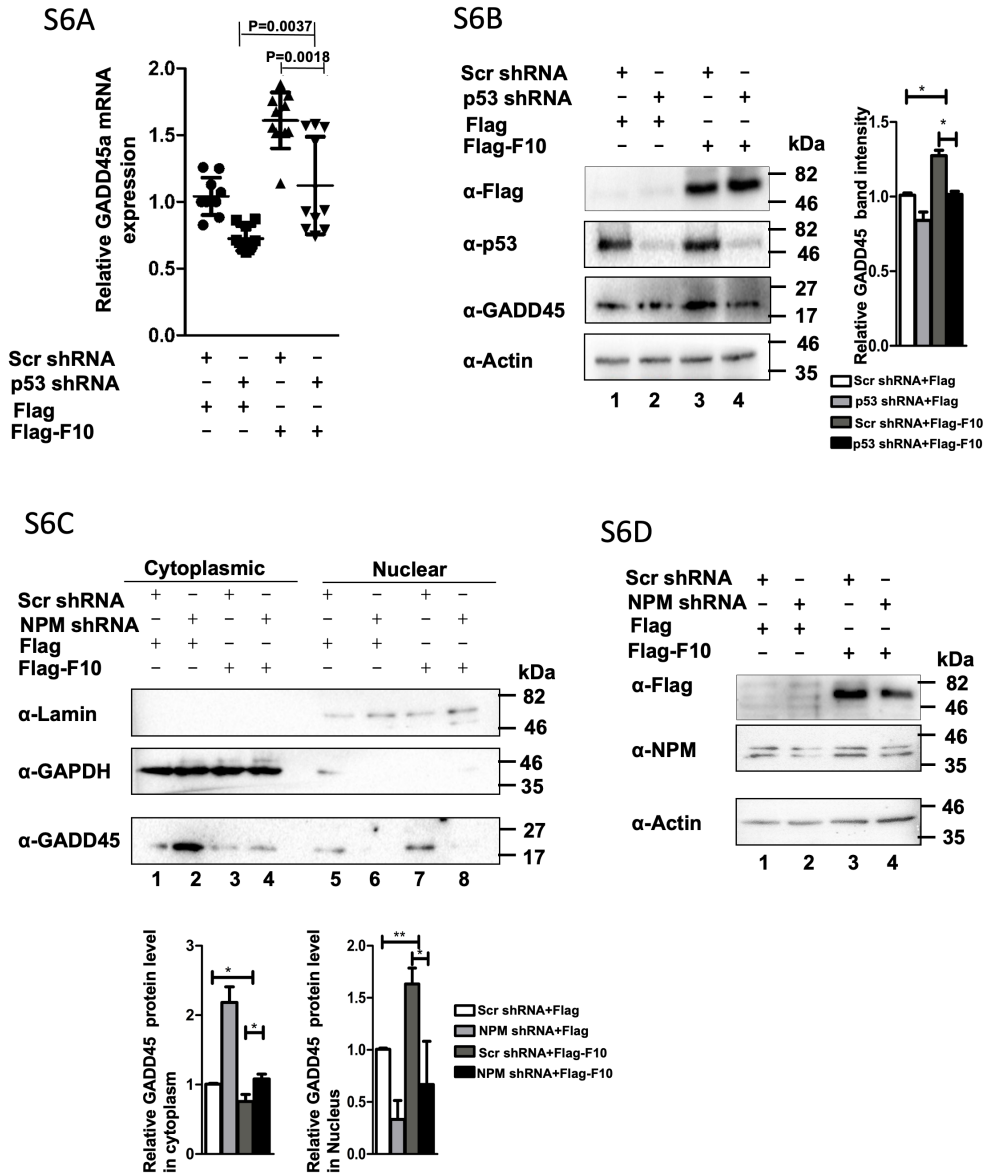

**Figure S6:** (A) RT-qPCR analysis indicates the dependency of p53 on RASSF10 mediated upregulation of GADD45a transcription. (B) Efficiency of p53 knockdown and the expression of RASSF10 and GADD45a were analysed by western blot using indicated antibodies. (C) RASSF10 mediated nuclear accumulation of GADD45a is NPM dependent in HCT116p53<sup>-/-</sup> cells. (D) Expression of RASSF10 and knockdown efficiency of NPM were determined by western blot analysis. The densitometry analysis of western blots was carried out by normalizing the expression level of endogenous proteins to  $\beta$ -actin, as loading control (n=3 and data is expressed as mean  $\pm$  SD). RASSF10 referred as F10. (\*p<0.05; \*\*p<0.01).

Supplementary Figure 7

S7A

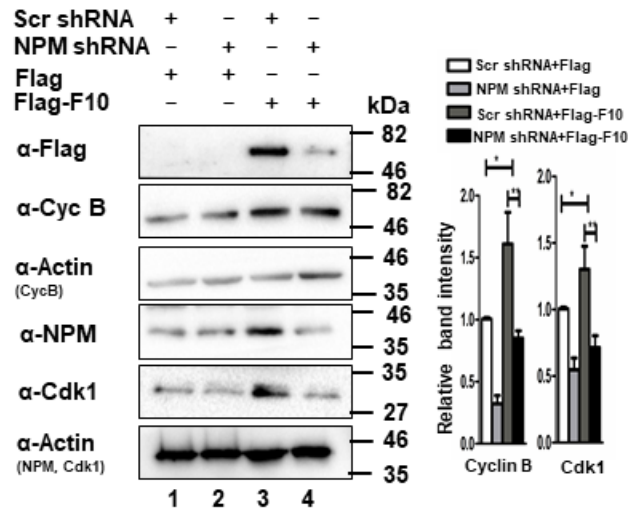

S7B

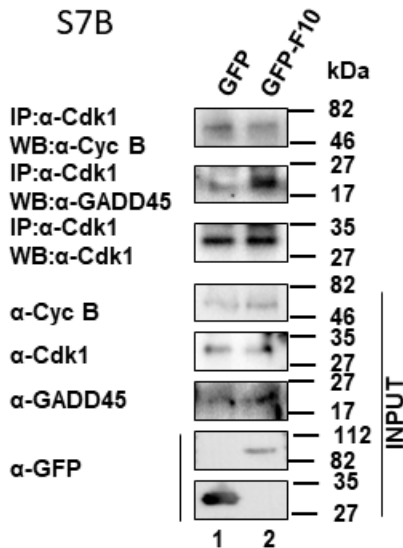

S7C

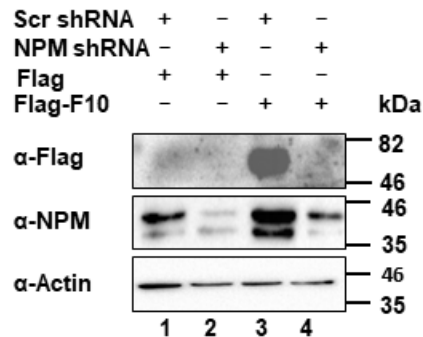

**Figure S7:** (A) Expression of RASSF10 promotes cyclin B and Cdk1 protein levels and this effect was reversed with the knockdown of NPM. (B) Ectopic expression of RASSF10 promoted the GADD45a association with Cdk1 and in contrast, reduced complex formation between cyclin-B and Cdk1. (C) Knockdown of NPM resulted in destabilization of RASSF10 in cells. Western blot analysis was performed to determine the protein levels of RASSF10 and NPM using indicated antibodies. (\* $p < 0.05$ ; \*\* $p < 0.01$ ).



Supplementary Figure 8

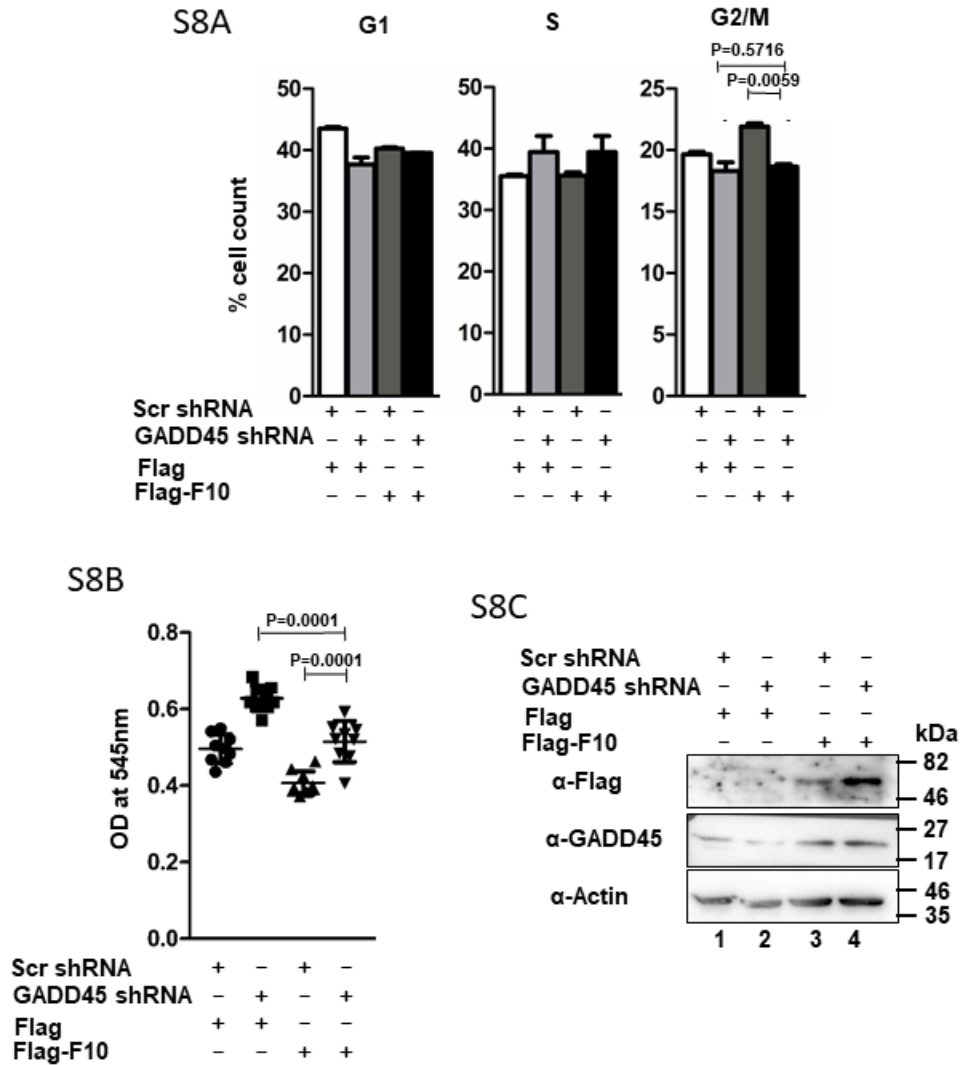

**Figure S8:** RASSF10 was expressed in AGS cells with or without GADD45a knockdown and analyzed the status of cell cycle profiles by Flow cytometry analysis (A) and cell proliferation/viability using MTT assay (B). (C) Expression levels of RASSF10 and efficiency of GADD45a knockdown were determined by western blot analysis using indicated antibodies.  $\beta$ -actin was used as loading control (n=3 and data is expressed as mean  $\pm$  SD). RASSF10 referred as F10; Cyclin-B referred as Cyc B.

Supplementary Figure 9

S9A

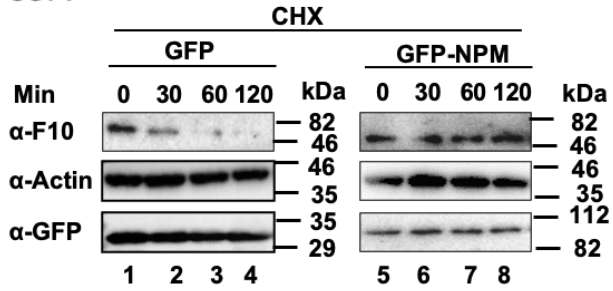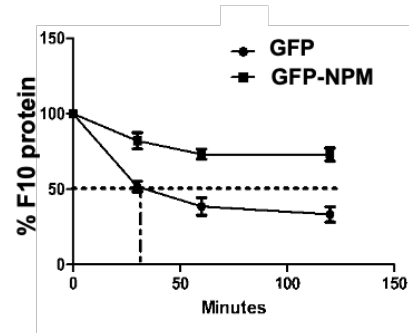

S9B

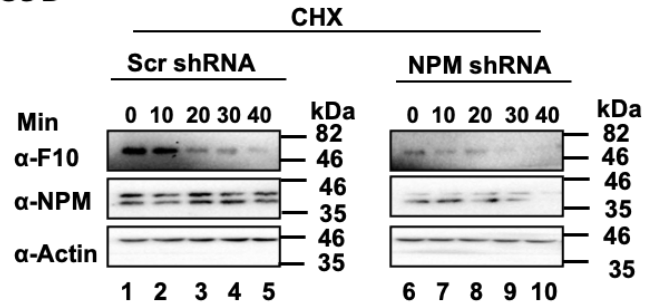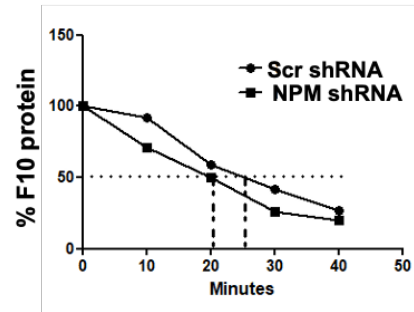

**Figure S9:** (A) Results from cycloheximide (CHX) chase assay indicate that the expression of NPM increased the steady state levels of RASSF10 whereas (B) Knockdown of NPM resulted in decreased half-life of RASSF10. The densitometry analyses were carried out by normalizing to  $\beta$ -actin and plotted against time to calculate half-life of RASSF10 (n=3 and data is expressed as mean  $\pm$  SD). RASSF10 referred as F10.

Supplementary Figure 10

S10A

**BDM-PUB: Prediction of Ubiquitination sites with Bayesian Discriminant Method**

| Peptide         | Position | Score | Threshold |
|-----------------|----------|-------|-----------|
| **MDPSEKKISWWIC | 6        | 0.95  | 0.30      |
| SLAMTQEKQRRVWRK | 172      | 0.34  | 0.30      |
| KQRRVVRKAFRKLAK | 179      | 1.57  | 0.30      |
| VVRKAFRKLAKLNRR | 183      | 3.51  | 0.30      |
| KAFRKLAKLNRRRQQ | 186      | 1.91  | 0.30      |
| NTDLEAVKSDLDYSQ | 412      | 1.29  | 0.30      |
| DQARGLAKSGPGNDE | 476      | 1.00  | 0.30      |

**UbPred: predictor of protein ubiquitination sites**

MDPSEKISWWICQEEKLVSGLSRRITCSDVWRVLLDGCRRRRRQRRSRRLGSAGDPHGPGEPEPPNEDDEDDEALPQGML  
CGPPQCYCIVEKWRGFERILPNKTRILRLWAAWGEEQENVRFVLVRSEASLPNAGPRS AEARVLSRERPCARGAPARPSLAMT  
QEKQRRVVRKAFRKLAKLNRRRQQQTPSSCSSTSSSTASSSSPRTHESASVERMETLVHLVLSQDHTIRQQVQRLHELDREIDH  
YEAQVHLDRMRRHGVNYVDQTYLVGAGIELDGSRPGEPEEVAEAEAAAAPPLAGEAQAALAEELARRCDDLRLQEQRVQQE  
ELLERLSAEIQEELNQRWMMRRRQEELAAREEPLPDGGPDGELLLEQERVRTQLSTSLYIGLRNLNTDLEAVKSDLDYSQQQWDSKK  
RELQGLLQTLHTLELTVAPDGPAGSGSPSPREPQACADMWVDQARGLAKSGPGNDESDTGLSSMHSQSDSLPMECSLV

| Label             | Score range     | Sensitivity | Specificity |
|-------------------|-----------------|-------------|-------------|
| Low confidence    | 0.62 ≤ s ≤ 0.69 | 0.464       | 0.903       |
| Medium confidence | 0.69 ≤ s ≤ 0.84 | 0.346       | 0.950       |
| High confidence   | 0.84 ≤ s ≤ 1.00 | 0.197       | 0.989       |

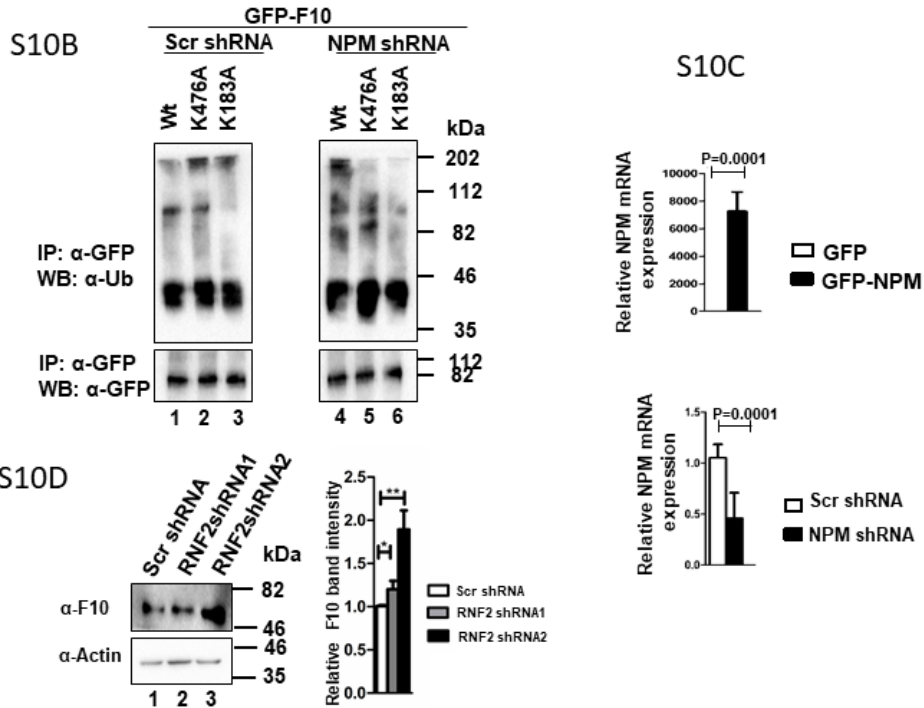

**Figure S10:** (A) Bioinformatics analysis predicted lysine residues at positions 183 and 476 may be the potential ubiquitination sites on RASSF10 protein. (B) NPM knockdown promotes the polyubiquitination of wild type and K476A not K183A variant of RASSF10. (C) Expression and knockdown efficiency of NPM were analysed by RT-qPCR. (D) RASSF10 protein levels were increased with knockdown of *RNF2* in AGS cells. The densitometry analysis of western blots was carried out by normalizing the expression level of endogenous proteins to  $\beta$ -actin, as loading control (n=3 and data is expressed as mean  $\pm$  SD). RASSF10 referred as F10; Ubiquitin referred as Ub. (\*p<0.05; \*\*p<0.01).

Supplementary Figure 11

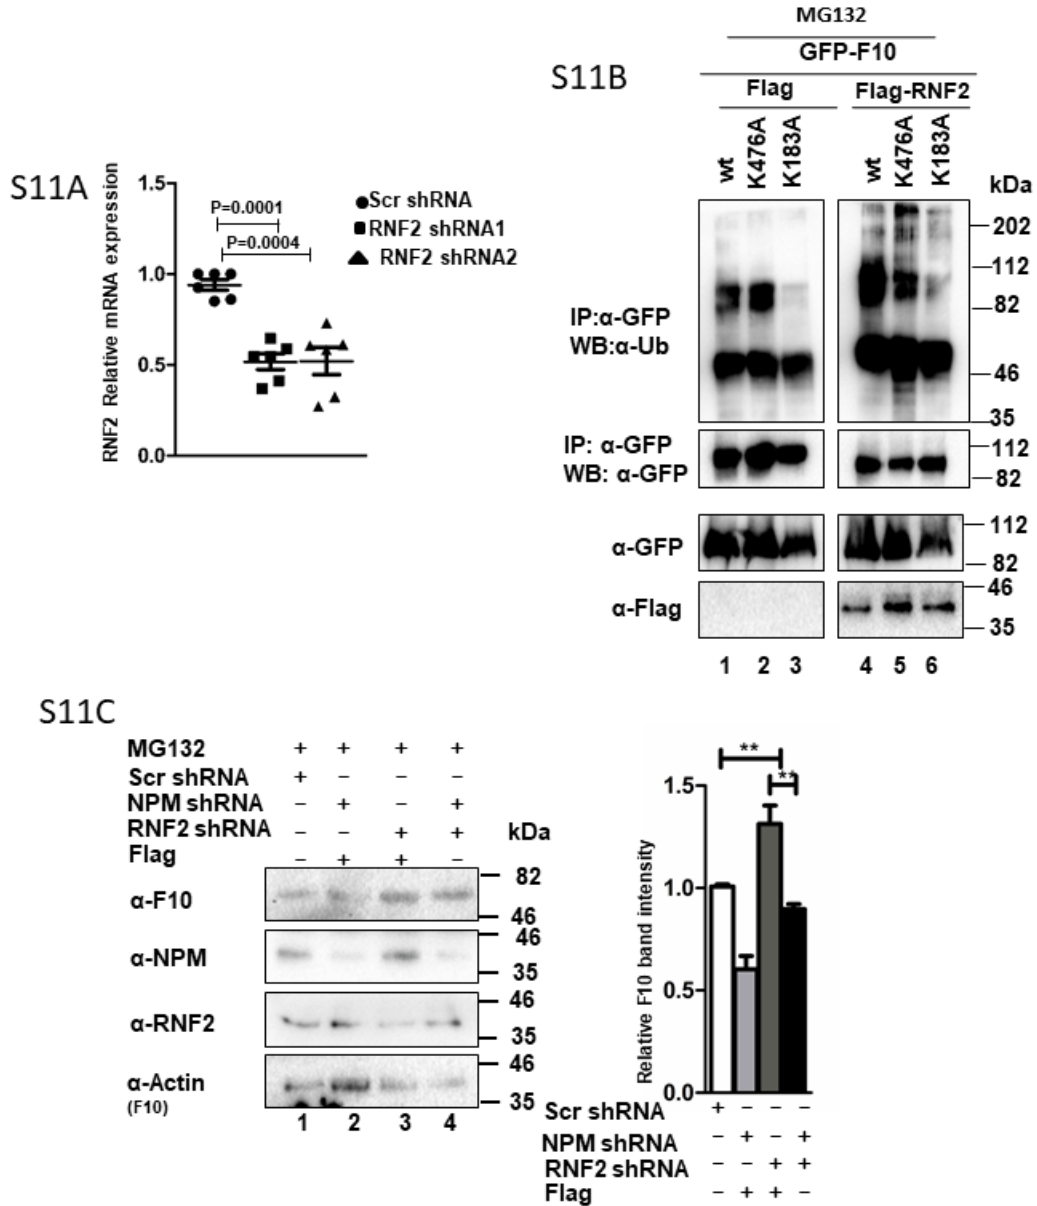

**Figure S11:** (A) RT-qPCR analysis was used to determine the efficiency of *RNF2* knockdown in AGS cells. (B) *RNF2* expression induces polyubiquitination of wildtype and K476A not K183A variant of RASSF10. (C) Western blot analysis was performed to check the effect of NPM and *RNF2* knockdowns on RASSF10 protein levels. The densitometry analysis of western blots was carried out by normalizing the expression level of endogenous proteins to  $\beta$ -actin, as loading control (n=3 and data is expressed as mean  $\pm$  SD). RASSF10 referred as F10; Ubiquitin referred as Ub. (\*p<0.05; \*\*p<0.01).

**Supplementary Table S1:** List of differentially expressed proteins in presence of RASSF10 expression were identified by LC-MS/MS.

| Spot ID | Accession No. | Description                                                                                | Score   | Coverage | No. of Peptides | PSMs | No. of AAs | MW [kDa] | Calc. pI | MW [kDa] 2D | pI 2D |
|---------|---------------|--------------------------------------------------------------------------------------------|---------|----------|-----------------|------|------------|----------|----------|-------------|-------|
| 2       | P02769        | Serum albumin                                                                              | 38.57   | 22.41    | 12              | 16   | 607        | 69.2     | 6.18     | 60          | 5.4   |
| 4       | P48616        | Vimentin                                                                                   | 62.86   | 37.98    | 19              | 21   | 466        | 53.7     | 5.12     | 54          | 5     |
| 6       | P04181        | Ornithine aminotransferase                                                                 | 85.30   | 43.51    | 14              | 25   | 439        | 48.5     | 7.03     | 47          | 6.4   |
| 8       | P31942        | Heterogeneous nuclear ribonucleoprotein H3                                                 | 305.44  | 63.87    | 15              | 85   | 346        | 36.9     | 6.87     | 35          | 6.5   |
| 10      | P31942        | Heterogeneous nuclear ribonucleoprotein H3                                                 | 129.64  | 64.16    | 13              | 37   | 346        | 36.9     | 6.87     | 35          | 6.5   |
| 12      | P06748        | Nucleophosmin                                                                              | 4420.53 | 62.24    | 23              | 1150 | 294        | 32.6     | 4.78     | 32          | 4     |
| 15      | P04406        | Glyceraldehyde-3-phosphate dehydrogenase                                                   | 1059.90 | 59.10    | 16              | 247  | 335        | 36.0     | 8.46     | 30          | 8.2   |
| 18      | Q6PUJ7        | Prohibitin                                                                                 | 2682.29 | 94.85    | 28              | 653  | 272        | 29.8     | 5.76     | 25          | 5.2   |
| 19      | Q13162        | Peroxisiredoxin-4                                                                          | 841.92  | 46.49    | 17              | 237  | 271        | 30.5     | 6.29     | 23          | 5.7   |
| 37      | P05387        | 60S acidic ribosomal protein                                                               | 1668.76 | 80.00    | 12              | 428  | 115        | 11.7     | 4.54     | 13          | 3.5   |
| 38      | P78371        | T-complex protein 1 subunit beta                                                           | 3229.10 | 73.08    | 42              | 889  | 535        | 57.5     | 6.46     | 41          | 7     |
| 39      | P12277        | Creatine kinase B-type                                                                     | 90.37   | 47.77    | 11              | 24   | 381        | 42.6     | 5.59     | 33          | 6.8   |
| 40      | P68032        | Actin, alpha cardiac muscle 1                                                              | 315.01  | 31.83    | 14              | 86   | 377        | 42       | 5.39     | 30          | 6.4   |
| 41      | P07195        | L-lactate dehydrogenase B chain                                                            | 1730.66 | 70.96    | 30              | 522  | 334        | 36.6     | 6.05     | 27          | 6     |
| 44      | H0YN26        | Acidic leucine-rich nuclear phosphoprotein32 family member A                               | 82.38   | 40.11    | 6               | 27   | 177        | 20.0     | 4.58     | 18          | 5.5   |
| 45      | E7EUT5        | Glyceraldehyde-3-phosphate dehydrogenase                                                   | 425.97  | 45.38    | 7               | 118  | 260        | 27.9     | 6.95     | 20          | 6.5   |
| 46      | F8W1A4        | Adenylate kinase 2, mitochondrial                                                          | 48.33   | 45.26    | 7               | 12   | 232        | 25.6     | 7.83     | 21          | 8.4   |
| 46      | J3QSB7        | Purine nucleoside phosphorylase                                                            | 46.62   | 29.34    | 4               | 13   | 242        | 26.8     | 6.84     | 21          | 8.4   |
| 51      | B5BU83        | Stathmin                                                                                   | 113.45  | 48.32    | 8               | 43   | 149        | 17.3     | 5.97     | 16          | 5.7   |
| 53      | P06733        | Alpha-enolase                                                                              | 2777.69 | 81.8     | 41              | 797  | 434        | 47.1     | 7.39     | 41          | 8.5   |
| 55      | E7EUT5        | Glyceraldehyde-3-phosphate dehydrogenase                                                   | 41.12   | 63.08    | 8               | 11   | 260        | 27.9     | 6.95     | 29          | 8     |
| 56      | B2R860        | Ribose-phosphate pyrophosphokinase                                                         | 59.41   | 21.38    | 5               | 15   | 318        | 34.6     | 6.46     | 27          | 7.2   |
| 58      | P53004        | Biliverdin reductase A                                                                     | 64.67   | 43.24    | 9               | 16   | 296        | 33.4     | 6.44     | 30          | 7     |
| 66      | P63104        | 14-3-3 protein zeta/delta                                                                  | 236.98  | 56.73    | 14              | 71   | 245        | 27.7     | 4.79     | 23          | 3     |
| 67      | P54105        | Methylosome subunit pICln                                                                  | 1274.44 | 54.01    | 7               | 384  | 237        | 26.2     | 4.11     | 29          | 3     |
| 69      | Q14257        | Reticulocalbin-2                                                                           | 529.60  | 59.31    | 18              | 153  | 317        | 36.9     | 4.40     | 40          | 3.5   |
| 70      | Q5T8M8        | Actin, alpha skeleton muscle                                                               | 98.59   | 26.48    | 9               | 28   | 287        | 32.0     | 5.41     | 32          | 3     |
| 71      | Q01105        | Protein SET                                                                                | 283.32  | 53.79    | 22              | 75   | 290        | 33.5     | 5.24     | 31          | 3.5   |
| 72      | O14602        | Eukaryotic translation initiation factor 1A,                                               | 55.55   | 37.5     | 7               | 17   | 144        | 16.4     | 5.24     | 16          | 4.2   |
| 72a     | P13639        | Elongation factor 2                                                                        | 1119.17 | 50       | 45              | 334  | 858        | 95.3     | 6.83     | 80          | 7.9   |
| 73a     | P13639        | Elongation factor 2                                                                        | 576.88  | 40.09    | 27              | 151  | 858        | 95.3     | 6.83     | 80          | 8     |
| 74      | K7EM73        | Calpain small subunit 1 (Fragment)                                                         | 33.55   | 63.19    | 4               | 8    | 163        | 15.9     | 4.91     | 22          | 4.2   |
| 75      | P35232        | Prohibitin                                                                                 | 84.79   | 64.71    | 14              | 25   | 272        | 29.8     | 5.76     | 22          | 6.3   |
| 76      | P62258        | 14-3-3 protein epsilon                                                                     | 52      | 46.67    | 10              | 15   | 255        | 29.2     | 4.74     | 23          | 6.1   |
| 78      | Q13347        | Eukaryotic translation initiation factor 2 subunit                                         | 341.42  | 58.46    | 18              | 99   | 325        | 36.5     | 5.64     | 28          | 5.3   |
| 79      | Q15181        | Inorganic pyrophosphatase                                                                  | 1061.49 | 60.9     | 24              | 275  | 289        | 32.6     | 5.86     | 28          | 5.5   |
| 79      | P07195        | L-lactate dehydrogenase B chain                                                            | 227.41  | 49.1     | 21              | 67   | 334        | 36.6     | 6.05     | 28          | 5.5   |
| 81      | B3KX11        | cDNA FLJ44436 fis, clone UTERU2019706, highly similar to T-complex protein 1 subunit gamma | 1022.60 | 56.51    | 34              | 294  | 522        | 57.9     | 6.93     | 55          | 7     |
| 84      | Q5T6W5        | Heterogeneous nuclear ribonucleoprotein K                                                  | 712.63  | 43.22    | 21              | 195  | 428        | 47.5     | 5.63     | 42          | 5.5   |
| 85      | P31930        | Cytochrome b-c1 complex subunit 1,                                                         | 651.62  | 35.42    | 18              | 181  | 480        | 52.6     | 6.37     | 41          | 6.1   |
| 87      | P63104        | 14-3-3 protein zeta/delta                                                                  | 61.72   | 42.04    | 11              | 17   | 245        | 27.7     | 4.79     | 21          | 5     |
| 88      | P04632        | Calpain small subunit 1                                                                    | 303.29  | 52.99    | 9               | 76   | 268        | 28.3     | 5.2      | 20          | 4.7   |
| 89      | P09211        | Glutathione S-transferase P                                                                | 138.93  | 57.14    | 7               | 40   | 210        | 23.3     | 5.64     | 20          | 5     |
| 90      | Q04760        | Lactoylglutathione lyase                                                                   | 336.63  | 44.57    | 12              | 99   | 184        | 20.8     | 5.31     | 19          | 4.8   |
| 91      | P12004        | Proliferating cell nuclear antigen                                                         | 177.82  | 43.30    | 7               | 51   | 261        | 28.8     | 4.69     | 27          | 3.9   |
| 92      | E7EUT5        | Glyceraldehyde-3-phosphate dehydrogenase                                                   | 41.40   | 41.92    | 5               | 11   | 260        | 27.9     | 6.95     | 29          | 7     |
| 93      | P04406        | Glyceraldehyde-3-phosphate dehydrogenase                                                   | 1782.62 | 59.40    | 18              | 504  | 335        | 36.0     | 8.46     | 30          | 9     |
| 94      | P04406        | Glyceraldehyde-3-phosphate dehydrogenase                                                   | 2917.44 | 75.22    | 22              | 772  | 335        | 36       | 8.46     | 28          | 10    |
| 96      | Q53HF2        | Heat shock 70kDa protein B isoform 2 variant                                               | 70.46   | 35.5     | 13              | 19   | 493        | 53.5     | 5.86     | 48          | 6.2   |
| 97      | Q5CAQ5        | Tumor rejection antigen (Gp96) 1                                                           | 220.31  | 53.12    | 38              | 67   | 802        | 92.3     | 4.86     | 90          | 3.8   |

¶¶ The table shows list of 50 significantly deregulated proteins in presence of RASSF10. Details of Spot ID, accession number, protein name, score, % coverage, number of covering peptides, peptide spectrum match (PSM), amino acid number (AA), molecular weight (calc MW) and calculated isoelectric point (calc. pI) are detailed.

**Supplementary Table S2:** RT-qPCR analysis validated the expression of genes that are deregulated by RASSF10.

| Spot ID | Accession No. | Description                                                  | Score   | Coverage | Relative Status in Mass spec analysis | qRT PCR |         |
|---------|---------------|--------------------------------------------------------------|---------|----------|---------------------------------------|---------|---------|
|         |               |                                                              |         |          |                                       | Status  | P-Value |
| 10      | P31942        | Heterogeneous nuclear ribonucleoprotein H3                   | 129.64  | 64.16    | Up                                    | Up      | 0.04    |
| 12      | P06748        | Nucleophosmin                                                | 4420.53 | 62.24    | Up                                    | Up      | 0.034   |
| 15      | P04406        | Glyceraldehyde-3-phosphate dehydrogenase                     | 1059.90 | 59.10    | Down                                  | Up      | 0.028   |
| 18      | Q6PUJ7        | Prohibitin                                                   | 2682.29 | 94.85    | Up                                    | Up      | 0.6     |
| 19      | Q13162        | Peroxiredoxin-4                                              | 841.92  | 46.49    | Up                                    | Up      | 0.8     |
| 37      | P05387        | 60S acidic ribosomal protein                                 | 1668.76 | 80.00    | Down                                  | Nc      | 0.3     |
| 38      | P78371        | T-complex protein 1 subunit beta                             | 3229.10 | 73.08    | Down                                  | Down    | 0.05    |
| 39      | P12277        | Creatine kinase B-type                                       | 90.37   | 47.77    | Down                                  | Down    | 0.4     |
| 40      | P68032        | Actin, alpha cardiac muscle 1                                | 315.01  | 31.83    | Down                                  | Nc      | 0.2     |
| 41      | P07195        | L-lactate dehydrogenase B chain                              | 1730.66 | 70.96    | Down                                  | Down    | 0.02    |
| 44      | H0YN26        | Acidic leucine-rich nuclear phosphoprotein32 family member A | 82.38   | 40.11    | Down                                  | Nc      | 0.19    |
| 46      | F8W1A4        | Adenylate kinase 2, mitochondrial                            | 48.33   | 45.26    | Down                                  | Down    | 0.08    |
| 46      | J3QSB7        | Purine nucleoside phosphorylase                              | 46.62   | 29.34    | Down                                  | Up      | 0.4     |
| 51      | B5BU83        | Stathmin                                                     | 113.45  | 48.32    | Down                                  | Up      | 0.54    |
| 53      | P06733        | Alpha-enolase                                                | 2777.69 | 81.8     | Down                                  | Up      | 0.021   |
| 56      | B2R860        | Ribose-phosphate pyrophosphokinase                           | 59.41   | 21.38    | Down                                  | Down    | 0.05    |
| 58      | P53004        | Biliverdin reductase A                                       | 64.67   | 43.24    | Down                                  | Up      | 0.14    |
| 66      | P63104        | 14-3-3 protein zeta/delta                                    | 236.98  | 56.73    | Down                                  | Up      | 0.7     |
| 67      | P54105        | Methylosome subunit pICln                                    | 1274.44 | 54.01    | Down                                  | Nc      | 0.84    |
| 69      | Q14257        | Reticulocalbin-2                                             | 529.60  | 59.31    | Down                                  | Down    | 0.16    |
| 72      | O14602        | Eukaryotic translation initiation factor 1A,                 | 55.55   | 37.5     | Up                                    | Up      | 0.06    |
| 73a     | P13639        | Elongation factor 2                                          | 576.88  | 40.09    | Up                                    | Up      | 0.042   |
| 74      | K7EM73        | Calpain small subunit 1 (Fragment)                           | 33.55   | 63.19    | Up                                    | Nc      | 0.62    |
| 76      | P62258        | 14-3-3 protein epsilon                                       | 52      | 46.67    | Down                                  | Nc      | 0.91    |
| 78      | Q13347        | Eukaryotic translation initiation factor 2 subunit           | 341.42  | 58.46    | Down                                  | Up      | 0.07    |
| 79      | Q15181        | Inorganic pyrophosphatase                                    | 1061.49 | 60.9     | Down                                  | Nc      | 0.75    |
| 85      | P31930        | Cytochrome b-c1 complex subunit 1,                           | 651.62  | 35.42    | Down                                  | Up      | 0.08    |
| 87      | P63104        | 14-3-3 protein gamma                                         | 61.72   | 42.04    | Down                                  | Down    | 0.067   |
| 89      | P09211        | Glutathione S-transferase P                                  | 138.93  | 57.14    | Down                                  | Up      | 0.05    |
| 90      | Q04760        | Lactoylglutathione lyase                                     | 336.63  | 44.57    | Down                                  | Down    | 0.32    |
| 91      | P12004        | Proliferating cell nuclear antigen                           | 177.82  | 43.30    | Down                                  | Nc      | 0.4     |
| 96      | Q53HF2        | Heat shock 70kDa protein 1 isoform 2 variant                 | 70.46   | 35.5     | Down                                  | Up      | 0.04    |
| 97      | Q5CAQ5        | Tumor rejection antigen (Gp96) 1                             | 220.31  | 53.12    | Down                                  | Down    | 0.5     |

**Supplementary Table S3:** Details of primers and shRNA sequence used in the current investigation.

| Gene                       | Sequence 5' to 3'                             |
|----------------------------|-----------------------------------------------|
| RASSF10 Fw<br>RASSF10 Rv   | GCTCAGTACCAGCCTTTACA<br>ACCGTCAGCTCCAAAGTGT   |
| GADD45A Fw<br>GADD45A Rv   | CCCGATAACGTGGTGTG<br>CAGGATGTTGATGTCGTCGTTCT  |
| Actin Fw<br>Actin Rv       | CCTTGACATGCCGGAG<br>GCACAGAGCCTTCGCCTT        |
| NPM Fw<br>NPM Rv           | GGTCTGCCCTGGAGGT<br>GGCGCTTTTCTTCAGCTT        |
| FBW7 Fw<br>FBW7 Rv         | CCAACTCTCTCCCCATTCT<br>TGCTGAACATGGTACAAGCC   |
| SKP2 Fw<br>SKP2 Rv         | CCAGGAACTGCTCTCAAACC<br>GAAGGGAGTCCCATGAAACA  |
| FBXO32 Fw<br>FBXO32 Rv     | AAAGAGCGCCATGGATATTG<br>TCAGGGATGTGAGCTGTGAC  |
| STUB1 Fw<br>STUB1 Rv       | AGCAGGGCAATCGTCTGTT<br>TGCTGCTGCATCTTCAGGTA   |
| DDB1 Fw<br>DDB1 Rv         | GATCATCCGGAATGGAATTG<br>TGAGAACTCTTGTCTGGCCC  |
| UBR7 Fw<br>UBR7 Rv         | GAGATTTGCTGATGAAGGCA<br>GGCTTGAATGAGAAAGCTTCA |
| RNF138 Fw<br>RNF138 Rv     | AGATGATTTCTACTGCCCCG<br>TGAGTTCCGTTTGTCTGCAC  |
| RNF2 Fw<br>RNF2 Rv         | AAGCTGAGGCTCGCCATATT<br>TGAGTTCCGTTTGTCTGCAC  |
| UBR3 Fw<br>UBR3 Rv         | GGCTAGAGAGAGGCAGCAGA<br>TACTGCCTCAGAAACCTGTG  |
| URF1 Fw<br>URF1 Rv         | ACCAAGGTGGAGGAGCTGAG<br>AGGAGCTGGATGGTGTTCATT |
| URF2 Fw<br>URF2 Rv         | TTGCTGCTGATGAAGACGTT<br>CCATTACCACATCACCAACAT |
| CYCLINB1 Fw<br>CYCLINB1 Rv | CCAAAGGCCACTAGGCCT<br>GGGGCGGGGCCACAG         |
| HNRPH3 Fw<br>HNRPH3 Rv     | CCTTCTTTGAACTGGACCCC<br>CTGTCCCATCACTAGCGTCA  |
| HSPB1 Fw<br>HSPB1 Rv       | TGACGGTCAAGACCAAGGAT<br>GGACAGGGAGGAGGAAACTT  |
| PHB Fw<br>PHB Rv           | ACCTCGAAAAATCTCCTCCC<br>CTCGTTCTCGTAGTCCAGC   |
| GAPDH Fw<br>GAPDH Rv       | TAAAAGCAGCCCTGGTGAC<br>CTCTGCTCCTCCTGTTGAC    |
| GSTP1 Fw<br>GSTP1 Rv       | GACCTCCGCTGCAAATACAT<br>AATGAAGGTCTTGCCTCCCT  |
| LDHB Fw<br>LDHB Rv         | CACCAGTTGCGGAAGAAGA<br>CCAAAACATCCACAAGAGCA   |
| LMNB1 Fw<br>LMNB1 Rv       | GATCGAGCTGGGCAAGTG<br>TGCAGTAGCAAGAGCTGCAT    |
| ANP32A Fw<br>ANP32A Rv     | GGATTCATTTAGAGCTGCGG<br>GGTGAGGCCACGTTGATTG   |
| CAPNS1 Fw<br>CAPNS1 Rv     | TCCGACGCTACTCAGATGAA<br>AGCCACTCCTGGATGTTTAC  |
| CCT2 Fw<br>CCT2 Rv         | GTGTGGAACGCCTAGCTCTT<br>GCAACCCAGAAAAGTGAAT   |
| Cox6A Fw<br>Cox6A Rv       | AGCCAGTTGGAAGTGGATTCT<br>TGTACCTGAAGTCGCACCAC |
| ACTRIA1 Fw<br>ACTRIA1 Rv   | TCCCAGAAAGGAGAGATTCC<br>TTGGAAAGCAGTATTTGGGG  |



RASSF10 regulates cell proliferation

|                                                            |                                                                   |
|------------------------------------------------------------|-------------------------------------------------------------------|
| AK2 Fw<br>AK2 Rv                                           | GGCAGAACCCGAGTATCCTA<br>CTCAGCATGTCCCCAGTAGC                      |
| CDK1 Fw<br>CDK1 Rv                                         | TTTCATGGCTACCACTTGACC<br>TAAGCCGGGATCTACCATAACC                   |
| ENO Fw<br>ENO Rv                                           | GAGATCTCGCCGGCTTTAC<br>AGTCAAAGATCTCCCTGGCA                       |
| EEF2 Fw<br>EEF2 Rv                                         | AGTCGGGAGAGCACATCATC<br>CGACTCTTCACTGACCGTCTC                     |
| <b>Cloning Primers:</b>                                    |                                                                   |
| RASSF10 Fw<br>RASSF10 Rv                                   | ATCGTGGGGTACCATGGATCCTTCGG<br>GCCTCACATATGCTACACAAGGGATTCG        |
| RASSF10 <sup>K183A</sup> Fw<br>RASSF10 <sup>K183A</sup> Rv | GCCTTTCGCGCGCTGGCCAAGCTC<br>GAGCTTGCCAGCGCGCAAAGGC                |
| RASSF10 <sup>K476A</sup> Fw<br>RASSF10 <sup>K476A</sup> Fw | GGAAGTGGCCGCTAGCGGTCCTGGC<br>GCCAGGACCGCTAGCGGCCAGTCC             |
| RNF2 Fw<br>RNF2 Rv                                         | AGTCGTGGTACCATGTCTCAGGCTGTGC<br>TTAGCCCTCGAGTCATTTGTGCTCCTTTGTAGG |
| <b>shRNA sequence:</b>                                     |                                                                   |
| GADD45a                                                    | CCGGGAAGACCGAAAGGATGGATAACTCGAGTTATCCATCCTTTGGTCTTCTTTTTG         |
| NPM                                                        | CCGGGCGCCAGTGAAGAAATCTATACTCGAGTATAGATTTCTTCACTGGCGCTTTTTG        |
| p <sup>53</sup>                                            | CCGGCGGCGCACAGAGGAAGAGAATCTCGAGATTCTTCTCTGTGCGCCGTTTTT            |
| RASSF10                                                    | CCGGAGAATGTGCGCTTCGTGCTAGCTCGAGCTAGCACGAAGCGCACATTCTTTTTTG        |
| RNF2                                                       | CCGGGCCAGGATCAACAAGCACAATCTCGAGATTGTGCTTGTGATCCTGGCTTTTTG         |
| Scrambled                                                  | CCGGGCGCGATAGCGCTAATAATTTCTCGAGAAATTATTAGCGCTATCGCGCTTTTT         |

**Supplementary Table S4: Details of reagents and antibodies used in the current investigation.**

| <b>Reagent</b>                                                     | <b>Source</b>                 | <b>Identifier</b>     |
|--------------------------------------------------------------------|-------------------------------|-----------------------|
| <b>Antibodies:</b>                                                 |                               |                       |
| Mouse monoclonal anti-GFP                                          | Santa cruz                    | Catalog: Sc996        |
| Rabbit polyclonal anti-RASSF10                                     | Abcam                         | Catalog: Ab113105     |
| Mouse monoclonal anti-Actin                                        | Sigma                         | Catalog:A5441         |
| Mouse monoclonal anti-Flag                                         | Sigma                         | Catalog: F3165        |
| Rabbit polyclonal anti-Flag                                        | Sigma                         | Catalog: F7425        |
| Rabbit polyclonal anti-CyclinB                                     | Santa cruz                    | Catalog: Sc166152     |
| Mouse monoclonal anti-Cdk1                                         | Abcam                         | Catalog: Ab18         |
| Mouse monoclonal anti-RNF2                                         | Sigma                         | Catalog: WH0006045M1  |
| Mouse monoclonal anti-Ubiquitin                                    | Cell Signalling<br>Technology | Catalog: 3936S        |
| Rabbit polyclonal anti-NPM1                                        | Santa cruz                    | Catalog: Sc5564       |
| Mouse monoclonal anti-NPM1                                         | Abcam                         | Catalog: Ab15440      |
| Rabbit polyclonal anti-GADD45a                                     | Cell Signalling<br>Technology | Catalog: 4632S        |
| Mouse monoclonal anti-Lamin                                        | Santa Cruz                    | Catalog: Sc377000     |
| Rabbit polyclonal anti-GAPDH                                       | Cell Signalling<br>Technology | Catalog: 2118S        |
| Rabbit polyclonal anti-APC1                                        | Abcam                         | Catalog: ab133397     |
| Rabbit polyclonal anti-APC1p355                                    | Abcam                         | Catalog: ab10923      |
| Goat anti-Mouse                                                    | Bio-rad                       | Catalog: 1706516      |
| Goat anti-Rabbit                                                   | Bio-rad                       | Catalog: 1706515      |
| <b>Chemicals:</b>                                                  |                               |                       |
| Dulbecco's Minimum Essential Medium (DMEM)                         | GIBCO                         | Catalog: 12800-017    |
| Trypsin EDTA                                                       | GIBCO                         | Catalog: 15400-054    |
| Antibiotic-Antimycotic                                             | GIBCO                         | Catalog: 15240-062    |
| Fetal Bovine Serum (FBS)                                           | GIBCO (south America)         | Catalog: 10270-106    |
| Phosphate Buffer Saline (PBS)                                      | GIBCO                         | Catalog: 21600-010    |
| Polyethylenimine (PEI)                                             | Polysciences                  | Catalog: 23966-1      |
| Dimethyl Sulfoxide (DMSO)                                          | Sigma-Aldrich                 | Catalog: D8414        |
| Proteosome inhibitor, MG132                                        | Sigma-Aldrich                 | Catalog: M7449        |
| TRIzol Reagent                                                     | Takara Clontech               | Catalog: 9101         |
| 3-(4,5-Dimethylthiazol-2-yl)-2,5-Diphenyltetrazolium Bromide (MTT) | Sigma-Aldrich                 | Catalog: M2003        |
| Propidium Iodide(PI)                                               | Sigma-Aldrich                 | Catalog: P4170        |
| AnnexinV-FITC apoptosis detection kit                              | BD Biosciences                | Catalog: 556547       |
| BrdU                                                               | BD Biosciences                | Catalog: 51-9000019AK |
| Syber green                                                        | Takara Clontech               | Catalog: RR820        |
| Thymidine                                                          | Sigma                         | Catalog: T79250       |
| IPG strip pH3-11 NL, 11cm                                          | GE Health care                | Catalog: 17600374     |
| IPG strip pH4-7, 7cm                                               | GE Health care                | Catalog: 17600110     |
| Mycoplasma detection kit                                           | Sigma-Aldrich                 | Catalog: MP0035       |

**Supplementary Table S5:** Details of gastric cancer tissue samples used for RT-qPCR analysis.

| <b>Sl.No:</b> | <b>Clinicopathological characteristic</b>                                   | <b>Number of samples</b> |
|---------------|-----------------------------------------------------------------------------|--------------------------|
| <b>1</b>      | <b>Total</b>                                                                | <b>16</b>                |
| <b>2</b>      | <b>Gender:</b><br>Male<br>Female                                            | 15<br>1                  |
| <b>3</b>      | <b>Age (years):</b><br>≤59<br>>59                                           | 7<br>9                   |
| <b>4</b>      | <b>Grade of differentiation:</b><br>Low (I-II)<br>Middle (III)<br>High (IV) | 8<br>3<br>5              |

**Supplementary Movie 1:** AGS cells were ectopically expressed with GFP-RASSF10 and were synchronized at G1 stage by double thymidine block and the status of cell cycle was analysed using live cell imaging as described in Materials and Methods.

**Supplementary Movie 2:** AGS cells were ectopically expressed with GFP and were synchronized at G1 stage by double thymidine block and the status of cell cycle was analysed using live cell imaging as described in Materials and Methods.
